# Supplementary material for: LingguizhuganDecoction Protects against High-Fat-Diet-Induced Nonalcoholic Fatty Liver Disease by Alleviating Oxidative Stress and Activating Cholesterol Secretion
Source: Hindawi journal article supplement (doi:10.1155/2017/2790864), 2017-01-01
Supplement: f1 [file 2790864.f1.pdf]

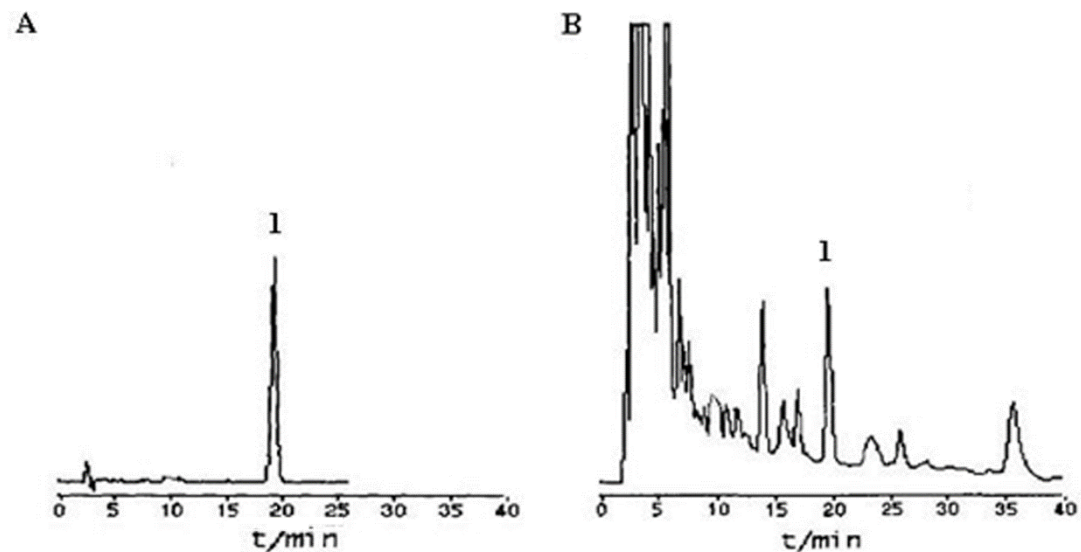

Figure S1. Quality control of *Lingguizhugan* Decoction under High Performance Liquid Chromatography (HPLC). A. Reference substance; B. *Lingguizhugan* Decoction 1. glycyrrhizic acid. Standardization of extract by HPLC glycyrrhizic acid was purchased from Shanghai R&D Centre for standardization of Chinese Medicines (Shanghai, China), and the purity was higher than 98.0%. HPLC-grade reagents were purchased from Burdick & Jackson. An Agilent 1100 HPLC system consisting of a G1354A pump, a G1313A auto-sampler, and a UV/VIS Photodiode Array G1315B Detector was used for all analyses. Chromatographic separations were carried out on an Merck C18 hibar column (4.6 mm×250mm, 5 $\mu$ m) with methanol:acetonitrile : water :acetic acid(as solvent ) (15:35:45:0.9,v/v) in the mobile phase at a flow rate of 0.8 mL/min at 25°C for 40 min. Twenty  $\mu$ L (after a high speed centrifugation) of the sample was injected, and the signals were detected at 254 nm with UV detection. The HPLC fingerprint of *Lingguizhugan* decoction revealed the major peaks (glycyrrhizic acid) at 254 nm. The content of glycyrrhizic acid were 0.9548%.

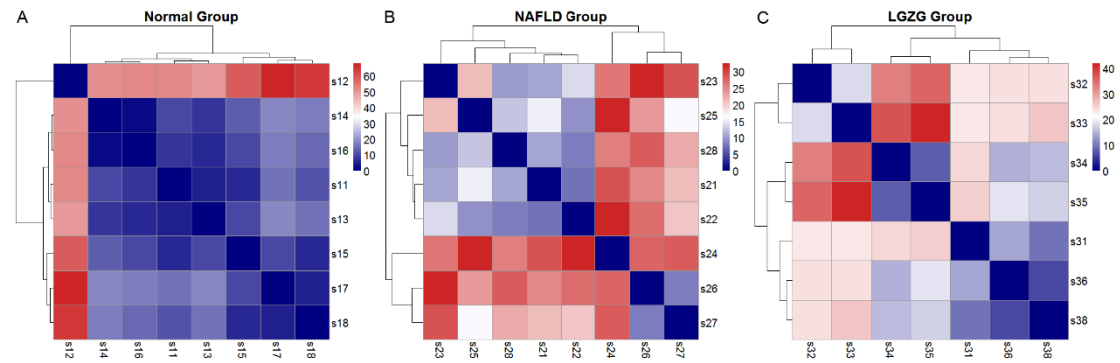

**Figure S2.** Hierarchical clustering of replicate samples based on correlation matrix in three groups: (A) Normal group; (B) NAFLD model group; (C) LGZG-treated group. Each column and row represents samples in each group. Each cell of the heatmap reflects the distance of two samples. Distance was measured with Euclidean metric. The legend of distance value is shown on the upper right. Figure S2A and figure S2B revealed that s12 and s24 were the outlier samples of normal group and NAFLD model group, respectively. Figure S2C showed no outlier samples, but the data in s37 was missed during assessment of serum ALT and AST. Thus, s37 in LGZG-treated group was also removed in the RNA-seq analysis.

Table S1. Primer pairs for real-time PCR analysis.

| Gene           | Forward primer       | Reverse primer        |
|----------------|----------------------|-----------------------|
| OSGIN1         | GCAGCAGATGATGCGTGAC  | GGAGCCGATGAGGACGAG    |
| IRF2BP2        | CCCCATCACCCCTACATCC  | GAACCTGGGTGGTATCTTTCG |
| AHR            | GCCAATACGCACCAAAAGC  | CCAAGTCCGCACTCACTC    |
| RASGEF1B       | CACCTCCCTTCTCAGCAATG | GCACCAAGTGTTGGATGAGC  |
| $\beta$ -ACTIN | CCCATCTATGAGGGTTACGC | TTAATGTCACGCACGATTTC  |

Table S2. Enriched KEGG pathways with NAFLD regulated genes.

| ID       | KEGG Pathway                            | Gene Ratio* | Background Ratio <sup>#</sup> | P value <sup>\$</sup> | Gene ID                                                                                                                                                                                                                                                                                                                                                                                                                                                                                                                               | Gene Count |
|----------|-----------------------------------------|-------------|-------------------------------|-----------------------|---------------------------------------------------------------------------------------------------------------------------------------------------------------------------------------------------------------------------------------------------------------------------------------------------------------------------------------------------------------------------------------------------------------------------------------------------------------------------------------------------------------------------------------|------------|
| rno00100 | Steroid biosynthesis                    | 8/355       | 20/8214                       | 8.983E-07             | Sqle/Msmo1/Cyp51/Dhcr7/Hsd17b7/Faxdc2/Dhcr24/Sc5d                                                                                                                                                                                                                                                                                                                                                                                                                                                                                     | 8          |
| rno05146 | Amoebiasis                              | 16/355      | 103/8214                      | 7.631E-06             | Adcy1/Serpinb9/Prkcb/Tlr4/Tlr2/Itgam/Itgb2/Lama4/Lama2/Plcb4/Serpinb6/Col4a1/Prkca/Actn1/Col4a2/Hspb1                                                                                                                                                                                                                                                                                                                                                                                                                                 | 16         |
| rno04151 | PI3K-Akt signalling pathway             | 32/355      | 336/8214                      | 1.966E-05             | Itga4/Osmr/Fgf1/Kitlg/Ddit4/Ccnd2/Col6a6/Cdkn1a/Tlr4/Tlr2/Reln/Itgb3/Creb3l2/Flt1/Thbs2/Syk/Lama4/Lama2/Kit/Tek/Col4a1/Prkca/Itga8/Csf1r/Col4a2/Kdr/Fgf21/LOC103692716/Efna1/Prlr/Gys2/Rps6kb2                                                                                                                                                                                                                                                                                                                                        | 32         |
| rno01040 | Biosynthesis of unsaturated fatty acids | 8/355       | 29/8214                       | 2.173E-05             | Scd2/Scd1/Fads1/Elovl6/Acot5/Elovl2/Acot4/Acot7                                                                                                                                                                                                                                                                                                                                                                                                                                                                                       | 8          |
| rno01100 | Metabolic pathways                      | 87/355      | 1336/8214                     | 2.9E-05               | Pla2g7/Asns/Hdc/Cyp7a1/Phgdh/Psat1/Pycr1/Cyp2c22/Acsm5/Acsm3/Cyp3a2/Tusc3/Mthfd2/Tyms/Gatm/Cers6/Adh7/Pld1/Pla2g4a/Csgalnact1/Pkm/Aldh1b1/Plcb4/Papss1/Idh2/Gcnt1/Aspa/Pgap1/Rrm2b/Alg10/Akr1d1/Hk3/Pklr/Sqle/Mgll/Msmo1/Idi1/Cyp51/Cyp2c13/Mvd/Hmgcs1/Fdps/Dhcr7/Hsd17b7/Faxdc2/Cyp17a1/Acot5/Pmvk/Cyp2c12/Hmgcr/Dhcr24/Isyna1/Acot4/Acss2/Cyp2b1/Hexdc/Me3/Cyp4a1/Acacb/Amdhd1/Pdpx/Fasn/Cyp8b1/Fpgs/Cyp3a23/3a1/Agpat3/Impa2/Mvk/Dgkq/Upp2/Gale/Gls2/Nnmt/Itpka/Agxt/Pemt/Asl/Gys2/Galk1/Inpp5b/Ptgis/Sc5d/Ephx2/Got1/Pgp/Pgls/Me1 | 87         |
| rno04621 | NOD-like receptor signalling            | 20/355      | 168/8214                      | 3.484E-05             | Ccl2/Gbp5/Cxcl1/Tnfaip3/Gbp4/Gbp2/Ripk3/Tlr4/Nlrp1a/Ccl5/Plcb4/Xiap/Trpm2/Cybb/Nfkbia/Casp1/Irf3/LOC103692716/Mapk1                                                                                                                                                                                                                                                                                                                                                                                                                   | 20         |

|              | pathway                               |        |          |           | 1/Oas1a                                                                                                                                   |    |
|--------------|---------------------------------------|--------|----------|-----------|-------------------------------------------------------------------------------------------------------------------------------------------|----|
| rno00<br>900 | Terpenoid<br>backbone<br>biosynthesis | 7/355  | 23/8214  | 3.571E-05 | Idi1/Mvd/Hmgcs1/Fdps/Pmvk/Hmgcr/Mvk                                                                                                       | 7  |
| rno00<br>140 | Steroid hormone<br>biosynthesis       | 13/355 | 83/8214  | 5.003E-05 | Cyp7a1/Cyp2c22/Cyp7b1/Akr1c1/Cyp3a2/Akr1d1/Cyp2c13/Hsd<br>17b7/Cyp17a1/Cyp2c12/Cyp2b1/Cyp3a23/3a1/Srd5a1                                  | 13 |
| rno05<br>140 | Leishmaniasis                         | 12/355 | 74/8214  | 6.861E-05 | RT1-Da/Itga4/RT1-DOb/RT1-Bb/RT1-Db1/Prkcb/Tlr4/Tlr2/Itgam<br>/Itgb2/Nfkb1a/Mapk11                                                         | 12 |
| rno05<br>152 | Tuberculosis                          | 20/355 | 185/8214 | 0.0001366 | Clec7a/RT1-Da/Ciita/Cd74/Itgax/RT1-DOb/RT1-Bb/RT1-Db1/Tlr<br>4/Tlr2/Itgam/Itgb2/Pla2r1/Ep300/Coro1a/Syk/Lsp1/Fcgr2b/Mrc1/<br>Mapk11       | 20 |
| rno05<br>164 | Influenza A                           | 19/355 | 171/8214 | 0.0001394 | RT1-Da/Ciita/Ccl2/RT1-DOb/RT1-Bb/RT1-Db1/Prkcb/Tlr4/Ccl5/<br>Ep300/Tnfsf10/Prkca/Nfkb1a/Casp1/Fdps/Socs3/Irf3/Mapk11/Oas<br>1a            | 19 |
| rno04<br>510 | Focal adhesion                        | 21/355 | 204/8214 | 0.0001871 | Itga4/Ccnd2/Col6a6/Prkcb/Reln/Cav2/Itgb3/Flt1/Thbs2/Parvg/La<br>ma4/Lama2/Fyn/Vav1/Col4a1/Xiap/Prkca/Itga8/Actn1/Col4a2/Kd<br>r           | 21 |
| rno00<br>620 | Pyruvate<br>metabolism                | 8/355  | 39/8214  | 0.0002132 | Me2/Pkm/Aldh1b1/Pklr/Acss2/Me3/Acacb/Me1                                                                                                  | 8  |
| rno04<br>640 | Hematopoietic<br>cell lineage         | 13/355 | 97/8214  | 0.0002551 | RT1-Da/Cd44/Itga4/Siglech/RT1-DOb/RT1-Bb/RT1-Db1/Cd7/Kit<br>lg/Itgam/Itgb3/Kit/Csf1r                                                      | 13 |
| rno04<br>145 | Phagosome                             | 20/355 | 199/8214 | 0.0003647 | Clec7a/RT1-Da/RT1-DOb/RT1-Bb/RT1-Db1/Tlr4/Tlr2/Msr1/Itga<br>m/Itgb2/RT1-M3-1/Itgb3/Thbs2/Pla2r1/Coro1a/Dync1h1/Fcgr2b/<br>Mrc1/Cybb/Tubb6 | 20 |
| rno04<br>015 | Rap1 signalling<br>pathway            | 21/355 | 218/8214 | 0.0004647 | Adcy1/Fgf1/Kitlg/Prkcb/Itgam/Itgb2/Itgb3/Flt1/Itgal/Gnai1/Plcb4<br>/Kit/Tek/Rasgrp3/Magi3/Prkca/Csf1r/Kdr/Fgf21/Mapk11/Efna1              | 21 |

|              |                                                   |        |          |           |                                                                                               |    |
|--------------|---------------------------------------------------|--------|----------|-----------|-----------------------------------------------------------------------------------------------|----|
| rno05<br>323 | Rheumatoid<br>arthritis                           | 12/355 | 92/8214  | 0.0005636 | RT1-Da/Ccl2/RT1-DOb/RT1-Bb/RT1-Db1/Tlr4/Tlr2/Itgb2/Ccl5/F<br>lt1/Itgal/Tek                    | 12 |
| rno04<br>380 | Osteoclast<br>differentiation                     | 15/355 | 133/8214 | 0.0005931 | Lck/Blnk/Tnfrsf11b/Fosl2/Lilrb4/Itgb3/Syk/Fyn/Fcgr2b/Cybb/Csf<br>1r/Pparg/Nfkbia/Socs3/Mapk11 | 15 |
| rno04<br>974 | Protein digestion<br>and absorption               | 12/355 | 93/8214  | 0.0006225 | Cpb1/Slc1a5/Xpnpep2/Kcnn4/Col6a6/Slc8a1/Eln/Col4a1/Slc38a2<br>/Col4a2/Kcnk5/Col27a1           | 12 |
| rno01<br>200 | Carbon<br>metabolism                              | 14/355 | 123/8214 | 0.000818  | Phgdh/Psat1/Me2/Pkm/Idh2/Hk3/Pklr/Acss2/Me3/Agxt/Got1/Pgp<br>/Pgls/Me1                        | 14 |
| rno05<br>145 | Toxoplasmosis                                     | 14/355 | 123/8214 | 0.000818  | RT1-Da/Ciita/RT1-DOb/RT1-Bb/RT1-Db1/Tlr4/Tlr2/Lama4/Lam<br>a2/Gnai1/Xiap/Nfkbia/Mapk11/Ldlr   | 14 |
| rno04<br>512 | ECM-receptor<br>interaction                       | 11/355 | 85/8214  | 0.0010152 | Cd44/Itga4/Col6a6/Reln/Itgb3/Thbs2/Lama4/Lama2/Col4a1/Itga8<br>/Col4a2                        | 11 |
| rno04<br>650 | Natural killer cell<br>mediated<br>cytotoxicity   | 12/355 | 101/8214 | 0.0013068 | Cd244/Lck/Prkcb/Itgb2/Prf1/Itgal/Syk/Cd48/Fyn/Vav1/Tnfsf10/Pr<br>kca                          | 12 |
| rno04<br>670 | Leukocyte<br>transendothelial<br>migration        | 13/355 | 118/8214 | 0.0016821 | Itga4/Prkcb/Cdh5/Msn/Itgam/Itgb2/Itgal/Gnai1/Vav1/Prkca/Cybb/<br>Actn1/Mapk11                 | 13 |
| rno03<br>320 | PPAR signalling<br>pathway                        | 10/355 | 82/8214  | 0.0026731 | Cyp7a1/Scd2/Scd1/Pparg/Dbi/Cyp4a1/Plin5/Cyp8b1/Fabp1/Me1                                      | 10 |
| rno05<br>150 | Staphylococcus<br>aureus infection                | 8/355  | 57/8214  | 0.0029098 | RT1-Da/RT1-DOb/RT1-Bb/RT1-Db1/Itgam/Itgb2/Itgal/Fcgr2b                                        | 8  |
| rno00<br>250 | Alanine, aspartate<br>and glutamate<br>metabolism | 6/355  | 35/8214  | 0.0035001 | Asns/Aspa/Gls2/Agxt/Asl/Got1                                                                  | 6  |
| rno04        | Bile secretion                                    | 9/355  | 72/8214  | 0.0036435 | Cyp7a1/Adcy1/Ephx1/Nr0b2/Abcg8/Hmgcr/Sult2a1/Ldlr/Abcg5                                       | 9  |

|              |                                        |        |          |           |                                                                                                           |    |
|--------------|----------------------------------------|--------|----------|-----------|-----------------------------------------------------------------------------------------------------------|----|
| 976          |                                        |        |          |           |                                                                                                           |    |
| rno04<br>978 | Mineral<br>absorption                  | 7/355  | 47/8214  | 0.0037507 | Heph/Mt2A/Slc8a1/Slc34a2/Cybrd1/Slc39a4/Slc26a6                                                           | 7  |
| rno04<br>514 | Cell adhesion<br>molecules<br>(CAMs)   | 16/355 | 176/8214 | 0.003867  | RT1-Da/Itga4/Sell/RT1-DOb/RT1-Bb/RT1-Db1/Spn/Ptprm/Cdh5/<br>Itgam/Itgb2/RT1-M3-1/Itgal/Ptpcr/Itga8/Icoslg | 16 |
| rno00<br>120 | Primary bile acid<br>biosynthesis      | 4/355  | 16/8214  | 0.0041285 | Cyp7a1/Cyp7b1/Akr1d1/Cyp8b1                                                                               | 4  |
| rno04<br>724 | Glutamatergic<br>synapse               | 12/355 | 116/8214 | 0.004227  | Slc1a2/Adcy1/Adrbk2/Prkcb/Pld1/Pla2g4a/Gnai1/Plcb4/Prkca/Slc<br>38a2/Grik5/Gls2                           | 12 |
| rno04<br>146 | Peroxisome                             | 10/355 | 88/8214  | 0.0044882 | Far1/Idh2/Pmvk/Crat/Pex11a/Mvk/Agxt/Pex6/Abcd3/Ephx2                                                      | 10 |
| rno04<br>666 | Fc gamma<br>R-mediated<br>phagocytosis | 10/355 | 90/8214  | 0.005272  | Prkcb/Pld1/Pla2g4a/Syk/Ptpcr/Vav1/Fcgr2b/Prkca/Arpc1a/Rps6k<br>b2                                         | 10 |
| rno00<br>062 | Fatty acid<br>elongation               | 5/355  | 29/8214  | 0.0073902 | Elov16/Acot5/Elov12/Acot4/Acot7                                                                           | 5  |
| rno05<br>416 | Viral myocarditis                      | 10/355 | 95/8214  | 0.0077033 | RT1-Da/RT1-DOb/RT1-Bb/RT1-Db1/Itgb2/RT1-M3-1/Prf1/Itgal/<br>Lama2/Fyn                                     | 10 |
| rno04<br>910 | Insulin signalling<br>pathway          | 13/355 | 141/8214 | 0.0078511 | Ppp1r3c/Srebf1/Foxo1/Pde3b/Hk3/Pklr/Socs3/Socs2/Acacb/Fasn/<br>Prkab1/Gys2/Rps6kb2                        | 13 |
| rno04<br>931 | Insulin resistance                     | 11/355 | 111/8214 | 0.0083129 | Ppp1r3c/Srebf1/Prkcb/Foxo1/Creb3l2/Nfkbia/Socs3/Acacb/Prkab<br>1/Gys2/Rps6kb2                             | 11 |
| rno00<br>591 | Linoleic acid<br>metabolism            | 6/355  | 42/8214  | 0.0087809 | Cyp2c22/Cyp3a2/Pla2g4a/Cyp2c13/Cyp2c12/Cyp3a23/3a1                                                        | 6  |
| rno04        | AMPK signalling                        | 12/355 | 129/8214 | 0.0097579 | Scd2/Srebf1/Scd1/Foxo1/Creb3l2/Pparg/Hmgcr/Acacb/Fasn/Prka                                                | 12 |

|          |                                                       |        |          |           |                                                                                                        |    |
|----------|-------------------------------------------------------|--------|----------|-----------|--------------------------------------------------------------------------------------------------------|----|
| 152      | pathway                                               |        |          |           | b1/Gys2/Rps6kb2                                                                                        |    |
| rno00830 | Retinol metabolism                                    | 9/355  | 85/8214  | 0.0108065 | Cyp2c22/Cyp3a2/Adh7/Lrat/Cyp2c13/Cyp2c12/Cyp2b1/Cyp4a1/Cyp3a23/3a1                                     | 9  |
| rno04916 | Melanogenesis                                         | 10/355 | 100/8214 | 0.0109206 | Adcy1/Wnt2/Kitlg/Prkcb/Creb3l2/Ep300/Gnai1/Plcb4/Kit/Prkca                                             | 10 |
| rno04360 | Axon guidance                                         | 15/355 | 180/8214 | 0.0110703 | Robo1/Smo/Unc5b/Unc5d/Nrp1/Ntn1/Sema6a/Dpysl2/Sema3d/Gnai1/Fyn/Prkca/Rgs3/Efna1/Sema6c                 | 15 |
| rno05134 | Legionellosis                                         | 7/355  | 58/8214  | 0.0119691 | Cxcl1/Tlr4/Tlr2/Itgam/Itgb2/Nfkbia/Casp1                                                               | 7  |
| rno04014 | Ras signalling pathway                                | 18/355 | 235/8214 | 0.0130606 | Fgf1/Rasgrp1/Kitlg/Prkcb/Rasa3/Ets1/Pld1/Pla2g4a/Flt1/Rgl1/Kit/Tek/Rasgrp3/Prkca/Csf1r/Kdr/Fgf21/Efna1 | 18 |
| rno04933 | AGE-RAGE signalling pathway in diabetic complications | 10/355 | 104/8214 | 0.0141574 | Ccl2/Prkcb/Foxo1/Plcb4/Col4a1/Prkca/Cybb/Thbd/Col4a2/Mapk11                                            | 10 |
| rno04672 | Intestinal immune network for IgA production          | 6/355  | 49/8214  | 0.018201  | RT1-Da/Itga4/RT1-DOb/RT1-Bb/RT1-Db1/Icoslg                                                             | 6  |
| rno04066 | HIF-1 signalling pathway                              | 10/355 | 109/8214 | 0.0191537 | Cdkn1a/Prkcb/Tlr4/Flt1/Ep300/Tek/Prkca/Cybb/Hk3/Rps6kb2                                                | 10 |
| rno05204 | Chemical carcinogenesis                               | 9/355  | 94/8214  | 0.019939  | Cyp2c22/Ephx1/Cyp3a2/Adh7/Cyp2c13/Cyp2c12/Sult2a1/Cyp2b1/Cyp3a23/3a1                                   | 9  |
| rno04668 | TNF signalling pathway                                | 10/355 | 110/8214 | 0.0202911 | Ccl2/Cxcl1/Tnfai3/Ripk3/Ccl5/Creb3l2/Ifi47/Nfkbia/Socs3/Mapk11                                         | 10 |
| rno04    | Cytokine-cytokine                                     | 17/355 | 229/8214 | 0.0205952 | Cxcl13/Ccl2/Osmr/Csf2rb/Kitlg/Lifr/Tnfrsf11b/Cxcl9/Il13ra1/Tnf                                         | 17 |



|              |                                                  |        |          |           |                                                                                                                                                                  |    |
|--------------|--------------------------------------------------|--------|----------|-----------|------------------------------------------------------------------------------------------------------------------------------------------------------------------|----|
| 060          | receptor interaction                             |        |          |           | rsf21/Ccl5/Flt1/Kit/Tnfsf10/Csf1r/Kdr/Prlr                                                                                                                       |    |
| rno04<br>062 | Chemokine signalling pathway                     | 14/355 | 177/8214 | 0.0209402 | Cxcl13/Fgr/Ccl2/Adcy1/Cxcl1/Adrbk2/Prex1/Cxcl9/Prkcb/Ccl5/Gnai1/Plcb4/Vav1/Nfkbia                                                                                | 14 |
| rno00<br>340 | Histidine metabolism                             | 4/355  | 25/8214  | 0.0211366 | Hdc/Aldh1b1/Aspa/Amdhd1                                                                                                                                          | 4  |
| rno04<br>940 | Type I diabetes mellitus                         | 8/355  | 80/8214  | 0.0217167 | RT1-Da/RT1-DOb/RT1-Bb/RT1-Db1/RT1-M3-1/Prf1/Ica1/Ptprn                                                                                                           | 8  |
| rno04<br>064 | NF-kappa B signalling pathway                    | 9/355  | 97/8214  | 0.0239562 | Bcl2a1/Tnfaip3/Lck/Blk/Prkcb/Tlr4/Syk/Xiap/Nfkbia                                                                                                                | 9  |
| rno05<br>200 | Pathways in cancer                               | 26/355 | 400/8214 | 0.0239727 | Adcy1/Smo/Fgf1/Wnt2/Rasgrp1/Kitlg/Cdkn1a/Prkcb/Foxo1/Ep300/Lama4/Lama2/Gnai1/Plcb4/Kit/Col4a1/Rasgrp3/Xiap/Prkca/Csf1r/Pparg/Nfkbia/Ar/Col4a2/Fgf21/LOC103692716 | 26 |
| rno00<br>590 | Arachidonic acid metabolism                      | 8/355  | 83/8214  | 0.0264587 | Cyp2c22/Pla2g4a/Cyp2c13/Cyp2c12/Cyp2b1/Cyp4a1/Ptgis/Ephx2                                                                                                        | 8  |
| rno04<br>950 | Maturity onset diabetes of the young             | 4/355  | 27/8214  | 0.0274148 | Pklr/Onecut1/Foxa2/Hhex                                                                                                                                          | 4  |
| rno01<br>212 | Fatty acid metabolism                            | 6/355  | 54/8214  | 0.0281176 | Scd2/Scd1/Fads1/Elovl6/Elovl2/Fasn                                                                                                                               | 6  |
| rno04<br>750 | Inflammatory mediator regulation of TRP channels | 10/355 | 116/8214 | 0.0281731 | Cyp2c22/Adcy1/Prkcb/Pla2g4a/Plcb4/Prkca/Cyp2c13/Cyp2c12/Cyp4a1/Mapk11                                                                                            | 10 |

|              |                                    |        |          |           |                                                                                                                                |    |
|--------------|------------------------------------|--------|----------|-----------|--------------------------------------------------------------------------------------------------------------------------------|----|
| rno01<br>230 | Biosynthesis of amino acids        | 8/355  | 85/8214  | 0.0299938 | Phgdh/Psat1/Pycr1/Pkm/Idh2/Pklr/Asl/Got1                                                                                       | 8  |
| rno00<br>650 | Butanoate metabolism               | 4/355  | 28/8214  | 0.0309279 | Acsm5/Acsm3/Aacs/Hmgcs1                                                                                                        | 4  |
| rno05<br>166 | HTLV-I infection                   | 20/355 | 296/8214 | 0.031373  | RT1-Da/RT1-DOb/RT1-Bb/RT1-Db1/Adcy1/Wnt2/Lck/Ccnd2/Cdkn1a/Nrp1/Ets1/Tp53inp1/Itgb2/RT1-M3-1/Itgal/Ep300/Xiap/Nfkbia/Fdps/Kat2a | 20 |
| rno04<br>922 | Glucagon signalling pathway        | 9/355  | 103/8214 | 0.0336619 | Foxo1/Creb3l2/Ep300/Pkm/Plcb4/Pde3b/Acacb/Prkab1/Gys2                                                                          | 9  |
| rno04<br>918 | Thyroid hormone synthesis          | 7/355  | 72/8214  | 0.0352378 | Adcy1/Serpina7/Prkcb/Creb3l2/Plcb4/Prkca/Ttr                                                                                   | 7  |
| rno04<br>540 | Gap junction                       | 8/355  | 88/8214  | 0.0358849 | Adcy1/Prkcb/Gnai1/Plcb4/Prkca/Tubb6/Tjp1/Map2k5                                                                                | 8  |
| rno05<br>162 | Measles                            | 11/355 | 138/8214 | 0.0363064 | Tnfaip3/Ccnd2/Tlr4/Tlr2/Msn/Fyn/Fcgr2b/Tnfsf10/Nfkbia/Irf3/Oas1a                                                               | 11 |
| rno04<br>340 | Hedgehog signalling pathway        | 5/355  | 43/8214  | 0.0367169 | Smo/Adrbk2/Ccnd2/Ihh/Csnk1g2                                                                                                   | 5  |
| rno05<br>205 | Proteoglycans in cancer            | 15/355 | 209/8214 | 0.0369739 | Cd44/Smo/Wnt2/Cdkn1a/Prkcb/Tlr4/Tlr2/Cav2/Msn/Itgb3/Prkca/Kdr/Ihh/Mapk11/Rps6kb2                                               | 15 |
| rno04<br>662 | B cell receptor signalling pathway | 7/355  | 73/8214  | 0.0375916 | Blnk/Prkcb/Syk/Vav1/Rasgrp3/Fcgr2b/Nfkbia                                                                                      | 7  |
| rno05<br>202 | Transcriptional misregulation in   | 13/355 | 174/8214 | 0.0381057 | Bcl2a1/Ccnd2/Cdkn1a/Mef2c/Foxo1/Itgam/Flt1/Erg/Fli1/Csf1r/Pparg/Dusp6/Hhex                                                     | 13 |

|              |                                                 |       |          |           |                                                     |   |
|--------------|-------------------------------------------------|-------|----------|-----------|-----------------------------------------------------|---|
|              | cancer                                          |       |          |           |                                                     |   |
| rno05<br>133 | Pertussis                                       | 7/355 | 74/8214  | 0.0400467 | Tlr4/Itgam/Itgb2/Gnai1/Casp1/Irf3/Mapk11            | 7 |
| rno05<br>142 | Chagas disease<br>(American<br>trypanosomiasis) | 9/355 | 108/8214 | 0.0435959 | Ccl2/Adcy1/Tlr4/Tlr2/Ccl5/Gnai1/Plcb4/Nfkbia/Mapk11 | 9 |
| rno04<br>370 | VEGF signalling<br>pathway                      | 6/355 | 60/8214  | 0.0440443 | Prkcb/Pla2g4a/Prkca/Kdr/Mapk11/Hspb1                | 6 |
| rno05<br>144 | Malaria                                         | 6/355 | 60/8214  | 0.0440443 | Ccl2/Tlr4/Tlr2/Itgb2/Thbs2/Itgal                    | 6 |
| rno04<br>917 | Prolactin<br>signalling<br>pathway              | 7/355 | 76/8214  | 0.045265  | Ccnd2/Cish/Socs3/Cyp17a1/Socs2/Mapk11/Prlr          | 7 |

\*Ratio of NAFLD regulated gene numbers annotated in this KEGG pathway to all gene numbers annotated in this KEGG pathway.

#Ratio of all gene numbers annotated in this KEGG pathway to all gene numbers annotated in all KEGG pathways.

\$P value was calculated from hypergeometric test.

Table S3. Enriched KEGG pathways with LGZG regulated genes.

| ID       | KEGG Pathway                                    | Gene Ratio* | Background Ratio <sup>#</sup> | P value <sup>\$</sup> | Gene ID                             | Gene Count |
|----------|-------------------------------------------------|-------------|-------------------------------|-----------------------|-------------------------------------|------------|
| rno04917 | Prolactin signaling pathway                     | 5/57        | 76/8214                       | 0.0001708             | Cish/Socs2/Gck/Pik3r1/Prlr          | 5          |
| rno04910 | Insulin signaling pathway                       | 6/57        | 141/8214                      | 0.0004064             | Socs2/Ppp1r3c/Gck/Pik3r1/Fasn/Foxo1 | 6          |
| rno04950 | Maturity onset diabetes of the young            | 3/57        | 27/8214                       | 0.0008235             | Onecut1/Foxa2/Gck                   | 3          |
| rno04976 | Bile secretion                                  | 4/57        | 72/8214                       | 0.0015099             | Abcg8/Abcg5/Nceh1/Nr0b2             | 4          |
| rno04630 | Jak-STAT signaling pathway                      | 5/57        | 151/8214                      | 0.0038136             | Cish/Socs2/Pik3r1/Cdkn1a/Prlr       | 5          |
| rno04930 | Type II diabetes mellitus                       | 3/57        | 52/8214                       | 0.0055043             | Socs2/Gck/Pik3r1                    | 3          |
| rno01212 | Fatty acid metabolism                           | 3/57        | 54/8214                       | 0.0061177             | Fasn/Scd1/Elov15                    | 3          |
| rno04213 | Longevity regulating pathway - multiple species | 3/57        | 65/8214                       | 0.0102107             | Foxa2/Pik3r1/Foxo1                  | 3          |
| rno04152 | AMPK signaling pathway                          | 5/57        | 129/8214                      | 0.0120739             | Pik3r1/Fasn/Foxo1/Scd1/Foxo3        | 4          |
| rno04115 | p53 signaling pathway                           | 3/57        | 71/8214                       | 0.0129762             | Rprm/Cdkn1a/Gadd45g                 | 3          |
| rno05218 | Melanoma                                        | 3/57        | 71/8214                       | 0.0129762             | Fgf21/Pik3r1/Cdkn1a                 | 3          |
| rno040   | FoxO signaling pathway                          | 5/57        | 136/8214                      | 0.01442               | Pik3r1/Foxo1/Cdkn1a/Gadd45g/Fox     | 4          |

|        |                                                          |      |          |         |                                 |   |
|--------|----------------------------------------------------------|------|----------|---------|---------------------------------|---|
| 68     |                                                          |      |          | 91      | o3/Bcl2l11                      |   |
| rno010 | Biosynthesis of unsaturated fatty acids                  | 2/57 | 29/8214  | 0.01703 | Scd1/Elovl5                     | 2 |
| 40     |                                                          |      |          | 66      |                                 |   |
| rno045 | Signaling pathways regulating pluripotency of stem cells | 4/57 | 143/8214 | 0.01705 | Onecut1/Pik3r1/Fzd1/Inhba       | 4 |
| 50     |                                                          |      |          | 83      |                                 |   |
| rno047 | Circadian rhythm                                         | 2/57 | 30/8214  | 0.01817 | Cry1/Cry2                       | 2 |
| 10     |                                                          |      |          | 31      |                                 |   |
| rno052 | Breast cancer                                            | 4/57 | 148/8214 | 0.01910 | Fgf21/Pik3r1/Cdkn1a/Fzd1        | 4 |
| 24     |                                                          |      |          | 92      |                                 |   |
| rno005 | Starch and sucrose metabolism                            | 2/57 | 32/8214  | 0.02053 | Pgm2l1/Gck                      | 2 |
| 00     |                                                          |      |          | 94      |                                 |   |
| rno052 | Prostate cancer                                          | 3/57 | 89/8214  | 0.02362 | Pik3r1/Foxo1/Cdkn1a             | 3 |
| 15     |                                                          |      |          | 82      |                                 |   |
| rno041 | mTOR signaling pathway                                   | 4/57 | 160/8214 | 0.02463 | Lpin1/Pik3r1/Fzd1/Ddit4         | 4 |
| 50     |                                                          |      |          | 79      |                                 |   |
| rno049 | Fat digestion and absorption                             | 2/57 | 40/8214  | 0.03118 | Abcg8/Abcg5                     | 2 |
| 75     |                                                          |      |          | 2       |                                 |   |
| rno052 | Transcriptional misregulation in cancer                  | 4/57 | 174/8214 | 0.03220 | Foxo1/Cdkn1a/Slc45a3/Aff1       | 4 |
| 02     |                                                          |      |          | 36      |                                 |   |
| rno040 | MAPK signaling pathway                                   | 5/57 | 259/8214 | 0.03314 | Dusp10/Fgf21/Il1b/Gadd45g/Dusp1 | 5 |
| 10     |                                                          |      |          | 92      |                                 |   |
| rno005 | Linoleic acid metabolism                                 | 2/57 | 42/8214  | 0.03411 | Cyp3a23/3a1/Cyp2j4              | 2 |
| 91     |                                                          |      |          | 91      |                                 |   |
| rno049 | AGE-RAGE signaling pathway in diabetic complications     | 3/57 | 104/8214 | 0.03524 | Il1b/Pik3r1/Foxo1               | 3 |
| 33     |                                                          |      |          | 27      |                                 |   |
| rno043 | Axon guidance                                            | 4/57 | 180/8214 | 0.03582 | Rgs3/Ablim3/Pik3r1/Dpysl2       | 4 |

|        |                                                     |      |          |         |                      |   |
|--------|-----------------------------------------------------|------|----------|---------|----------------------|---|
| 60     |                                                     |      |          | 2       |                      |   |
| rno049 | Insulin resistance                                  | 3/57 | 111/8214 | 0.04150 | Ppp1r3c/Pik3r1/Foxo1 | 3 |
| 31     |                                                     |      |          | 65      |                      |   |
| rno020 | ABC transporters                                    | 2/57 | 47/8214  | 0.04190 | Abcg8/Abcg5          | 2 |
| 10     |                                                     |      |          | 84      |                      |   |
| rno047 | Inflammatory mediator regulation of TRP channels    | 3/57 | 116/8214 | 0.04630 | Il1b/Cyp2j4/Pik3r1   | 3 |
| 50     |                                                     |      |          | 28      |                      |   |
| rno004 | Phenylalanine, tyrosine and tryptophan biosynthesis | 1/57 | 7/8214   | 0.04759 | Tat                  | 1 |
| 00     |                                                     |      |          | 3       |                      |   |

\*Ratio of LGZG regulated gene numbers annotated in this KEGG pathway to all gene numbers annotated in this KEGG pathway.

#Ratio of all gene numbers annotated in this KEGG pathway to all gene numbers annotated in all KEGG pathways.

\$P value was calculated from hypergeometric test.
